# Supplementary material
Source: PubMed Central journal article supplement (PMC4318783)
Supplement: NIHMS619529-supplement-03.pdf [file NIHMS619529-supplement-03.pdf]

**Supplemental Figure 1: Consort diagram of study population**

**2,140 eligible men from AGES-Reykjavik**  
Eligibility criteria included: 1) answers to questions about sleep, 2) recorded time of urine sample delivery, 3) gave informed consent for use of hospital data, 4) were not part of the home visit group

**Subcohort selection:  
randomly selected 50% sample**

**1,070 chosen for subcohort**

**1,070 not chosen for subcohort**

15 inadequate urine samples  
191 prevalent cancer

**Additional exclusions post subcohort selection**

5 inadequate urine samples  
245 prevalent cancer

**Final subcohort: 864**

**Final non-subcohort: 820**

**Case identification**

**Incident prostate cancer cases: 47**

**Non-cases: 817**

**Incident prostate cancer cases: 64**

**Total incident prostate cancer cases: 111**

**Supplemental Figure 2: Association between mean 6-sulfatoxymelatonin levels and sleep disruption in the subcohort, AGES-Reykjavik case-cohort study**

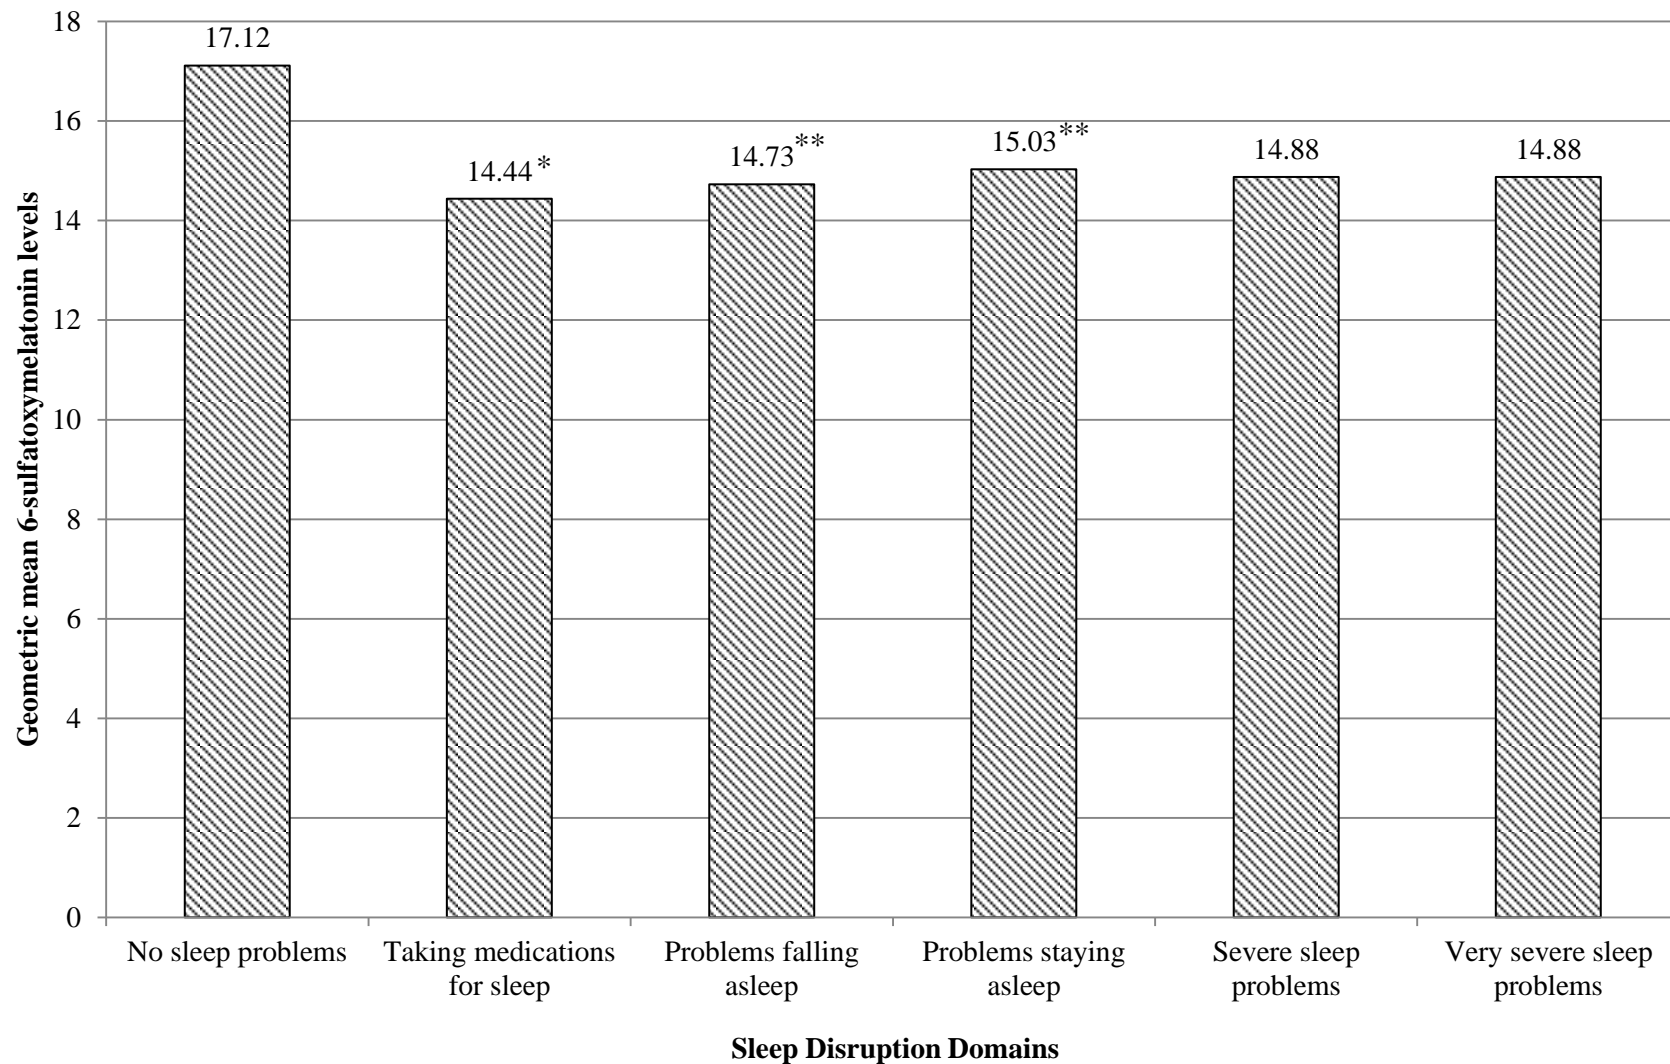

Adjusted for age and creatinine

\*Statistically significant difference at  $p < 0.05$ ; \*\*Statistically significant difference at  $p < 0.10$
